# Supplementary material for: Biodegradable polyurethane-incorporating decellularized spinal cord matrix scaffolds enhance Schwann cell reprogramming to promote peripheral nerve repair
Source: Royal Society of Chemistry journal article supplement (doi:10.1039/d2tb02679a), 2023-01-01
Supplement: d2tb02679a1.pdf [file d2tb02679a1.pdf]

Supporting information for

**Biodegradable polyurethane incorporating  
decellularized spinal cord matrix scaffold enhance  
Schwann cells reprogram to promote peripheral  
nerve repair**

Yanchao Wang<sup>1</sup>, Jingjing Lin<sup>2</sup>, Jinlin Chen<sup>2</sup>, Ruichao Liang<sup>1</sup>, Qiao Zhang<sup>1</sup>, Jiehua Li<sup>2</sup>,  
Min Shi<sup>3</sup>, Lei Li<sup>4</sup>, Xueling He<sup>2,5\*</sup>, Ting Lan<sup>3\*</sup>, Xuhui Hui<sup>1</sup> and Hong Tan<sup>2</sup>

1. Department of Neurosurgery, West China Hospital, Sichuan University, Chengdu,  
Sichuan, 610000, China.

2. College of Polymer Science and Engineering, State Key Laboratory of Polymer  
Materials Engineering, Med-X center of materials, Sichuan University, Chengdu,  
Sichuan, 610065, China.

3. Department of Pathology, Sichuan Cancer Hospital & Institute, Sichuan Cancer  
Center, Cancer Hospital affiliate to School of Medicine, UESTC, Chengdu, 610000,  
China.

4. Gastrointestinal Surgery Center, Sichuan Cancer Hospital & Institute, Sichuan  
Cancer Center, Cancer Hospital affiliate to School of Medicine, UESTC, Chengdu,  
610000, China.

5. Editorial Board of Journal of Sichuan University (Medical Sciences), Sichuan  
University, Chengdu, Sichuan, 610000, China.

\*, corresponding authors.

Xueling He: [hxlscu@163.com](mailto:hxlscu@163.com)

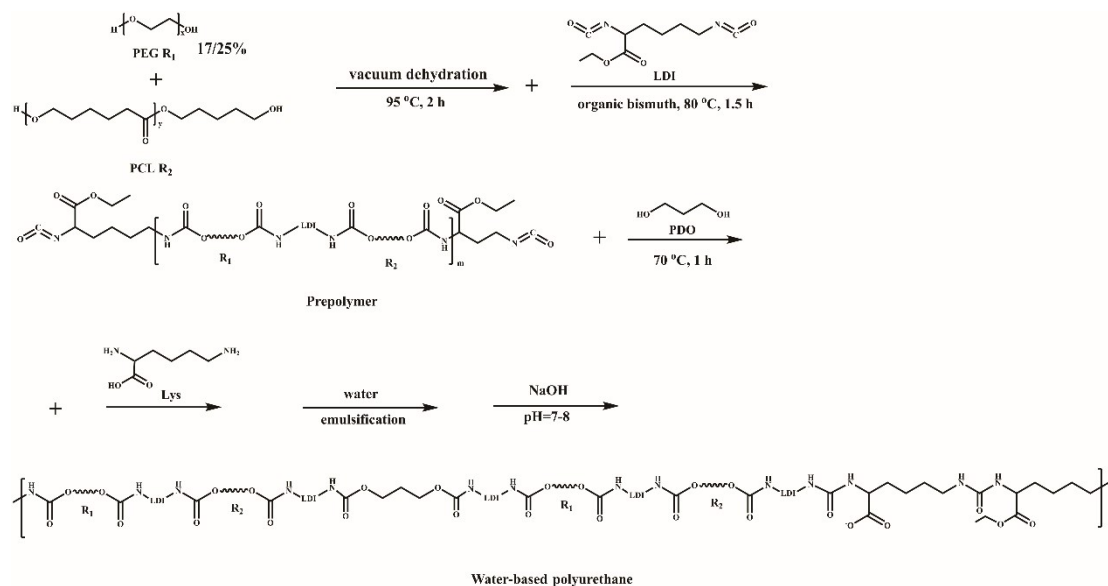

**Figure S1.** Schematic of the synthesis of BWPU.

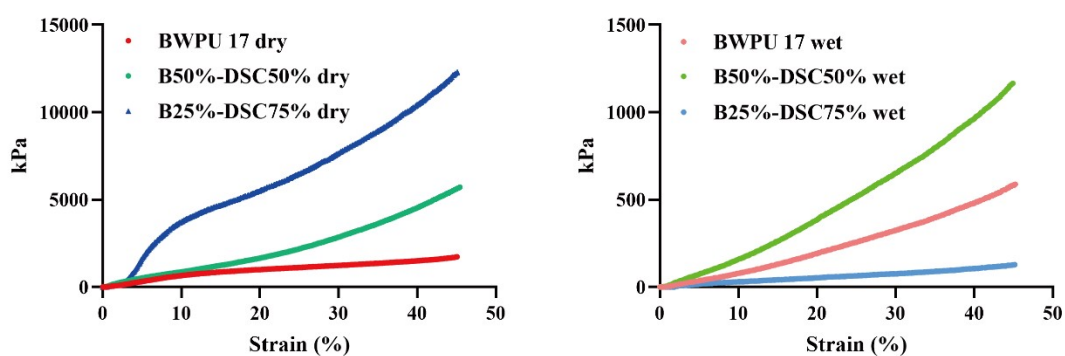

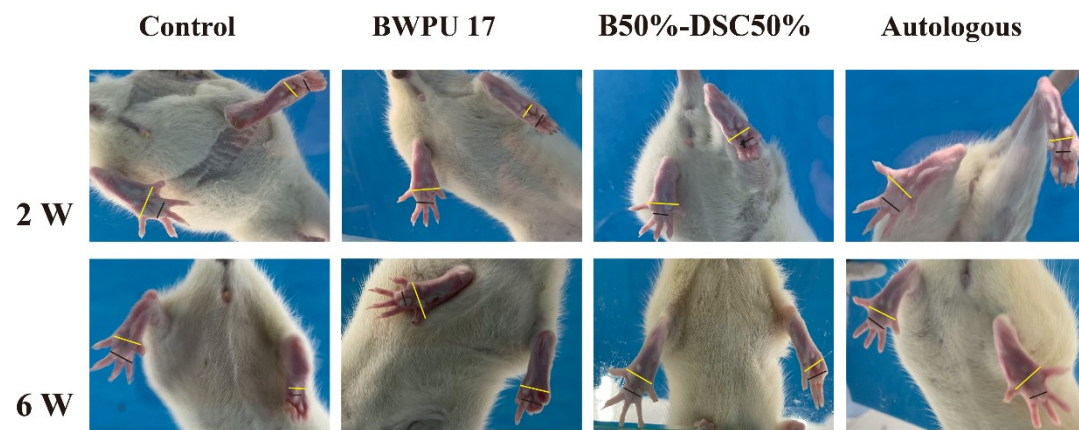

**Figure S3.** Functional recovery of the regenerated sciatic nerve at 2- and 6-weeks post-operation. Footprint photographs of rats in corresponding groups.
